# Supplementary material
Source: PubMed Central journal article supplement (PMC3617589)
Supplement: NIHMS445979-supplement-supporting_info.pdf [file NIHMS445979-supplement-supporting_info.pdf]

Supporting Information: Elemental Analyses

| Compd.       | Formula                                                    | Cald. |      |      | Found |      |      |
|--------------|------------------------------------------------------------|-------|------|------|-------|------|------|
|              |                                                            | C%    | H%   | N%   | C%    | H%   | N%   |
| <b>5a</b>    | C <sub>22</sub> H <sub>25</sub> N·HCl·0.5H <sub>2</sub> O  | 75.73 | 7.80 | 4.01 | 75.71 | 7.67 | 4.03 |
| <b>5b</b>    | C <sub>22</sub> H <sub>25</sub> N·HCl·1/3H <sub>2</sub> O  | 76.39 | 7.77 | 4.05 | 76.09 | 8.08 | 4.31 |
| <b>5c</b>    | C <sub>22</sub> H <sub>25</sub> N·HCl·H <sub>2</sub> O     | 73.83 | 7.89 | 3.91 | 73.78 | 8.13 | 4.10 |
| <b>6a</b>    | C <sub>22</sub> H <sub>29</sub> N·HCl·0.2H <sub>2</sub> O  | 76.03 | 8.82 | 4.03 | 76.13 | 8.77 | 4.31 |
| <b>6b</b>    | C <sub>22</sub> H <sub>29</sub> N·HCl·0.2H <sub>2</sub> O  | 76.03 | 8.82 | 4.03 | 76.30 | 8.94 | 4.39 |
| <b>6c</b>    | C <sub>22</sub> H <sub>29</sub> N·HCl·0.2H <sub>2</sub> O  | 76.03 | 8.82 | 4.03 | 76.40 | 9.20 | 4.05 |
| <b>13a</b>   | C <sub>22</sub> H <sub>27</sub> N·HCl·1/3H <sub>2</sub> O  | 75.95 | 8.30 | 4.03 | 75.97 | 8.55 | 4.23 |
| <b>13b</b>   | C <sub>22</sub> H <sub>27</sub> N·HCl                      | 77.28 | 8.25 | 4.10 | 76.88 | 8.60 | 4.32 |
| <b>13c</b>   | C <sub>22</sub> H <sub>27</sub> N·HCl                      | 77.28 | 8.25 | 4.10 | 77.01 | 8.54 | 4.27 |
| <b>13d</b>   | C <sub>22</sub> H <sub>27</sub> N·HCl                      | 77.28 | 8.25 | 4.10 | 77.14 | 8.37 | 4.07 |
| <b>17</b>    | C <sub>22</sub> H <sub>27</sub> N·HCl·0.5H <sub>2</sub> O  | 75.30 | 8.33 | 3.99 | 75.44 | 8.05 | 3.92 |
| <b>19</b>    | C <sub>22</sub> H <sub>25</sub> N·HCl                      | 77.74 | 7.71 | 4.12 | 77.38 | 7.62 | 4.10 |
| <b>20</b>    | C <sub>21</sub> H <sub>27</sub> N·HCl                      | 76.45 | 8.55 | 4.25 | 76.59 | 8.52 | 4.57 |
| <b>22a</b>   | C <sub>21</sub> H <sub>23</sub> N·HCl                      | 77.40 | 7.42 | 4.30 | 77.33 | 7.27 | 4.47 |
| <b>22b/c</b> | C <sub>21</sub> H <sub>23</sub> N·HCl·0.25H <sub>2</sub> O | 76.34 | 7.47 | 4.24 | 76.42 | 7.76 | 3.97 |
| <b>23a</b>   | C <sub>23</sub> H <sub>28</sub> NI                         | 62.02 | 6.34 | 3.14 | 62.06 | 6.71 | 3.28 |
| <b>23b</b>   | C <sub>23</sub> H <sub>28</sub> NI                         | 62.02 | 6.34 | 3.14 | 61.93 | 6.60 | 3.17 |
| <b>24a</b>   | C <sub>23</sub> H <sub>32</sub> NI·1/3H <sub>2</sub> O     | 60.66 | 7.23 | 3.08 | 60.71 | 7.72 | 3.26 |
| <b>24b</b>   | C <sub>23</sub> H <sub>32</sub> NI·0.5H <sub>2</sub> O     | 60.26 | 7.26 | 3.06 | 60.28 | 7.69 | 3.19 |
| <b>25a</b>   | C <sub>22</sub> H <sub>31</sub> N·HCl                      | 76.38 | 9.32 | 4.05 | 76.17 | 9.42 | 4.04 |
| <b>25b</b>   | C <sub>22</sub> H <sub>31</sub> N·HCl·0.5H <sub>2</sub> O  | 74.44 | 9.37 | 3.95 | 74.81 | 9.20 | 4.08 |
| <b>28a</b>   | C <sub>29</sub> H <sub>31</sub> N·HCl                      | 81.00 | 7.50 | 3.26 | 81.29 | 7.51 | 3.49 |
| <b>28b</b>   | C <sub>30</sub> H <sub>33</sub> N·HCl·0.75H <sub>2</sub> O | 78.75 | 7.82 | 3.06 | 78.45 | 8.20 | 3.30 |
| <b>29a</b>   | C <sub>29</sub> H <sub>31</sub> N·HCl·0.5H <sub>2</sub> O  | 79.34 | 7.58 | 3.19 | 79.44 | 8.03 | 3.56 |
| <b>29b</b>   | C <sub>30</sub> H <sub>33</sub> N·HCl·0.75H <sub>2</sub> O | 78.75 | 7.82 | 3.06 | 78.42 | 8.31 | 3.52 |
